# Supplementary material for: Calcium signaling mediates a biphasic mechanoadaptive response of endothelial cells to cyclic mechanical stretch
Source: PubMed Central journal article supplement — Mol Biol Cell. 2021 Aug 19;32(18):1724–36. doi: 10.1091/mbc.E21-03-0106 (PMC8684738; doi:10.1091/mbc.e21-03-0106), 2021-08-19

# Supplemental Materials

*Molecular Biology of the Cell*

Miroshnikova *et al.*

## Supplementary Figure Legends

### Supplementary Figure 1

**A, B.** Representative immunofluorescence images (A) and quantification (B) of vinculin staining show increased presence of vinculin at cell-matrix adhesions (CM) and adherens junction (AJ) at 30 min of stretch (mean  $\pm$ SD; n=3 independent experiments; \*p=0.043 (CM), \*p=0.046\*\*p=0.0023, ANOVA with Dunnett's; scale bars 30  $\mu$ m). **C, D.** Representative segmented images and quantification of cell aspect ratio and cell spread area show no substantial differences in response to stretch (mean  $\pm$ SD; n=3 independent experiments; scale bars 30  $\mu$ m). **E, F.** Quantification of adherens junction (AJ) remodeling from VE-Cadherin staining (E) and pMLC2 intensity (F) in response to specific stretch frequencies (mean  $\pm$ SEM; n=5 independent experiments; (mean  $\pm$ SEM; n=5 independent experiments; \*\*\*p=0.002 and \*\*p=0.0050 (VE-Cadherin 600mHz and 1200mHz) \*\*p=0.0037 and \*p=0.0266 (pMLC2 600mHz 30min and 1h) \*p=0.0424 and \*p=0.0233 (pMLC2 1200mHz 30min and 1h); ANOVA, Dunnett).

### Supplementary Figure 2

**A.** Principle component (PC) analyses of VE-Cadherin BioID2 pulldowns in response to 0, 30 and 360 min of stretch show subtle changes in VE-Cadherin interactome upon 30 min and 3h of stretch. **B.** Examples of significantly altered VE-Cadherin interacting proteins upon stretch. **C.** Pie chart annotating Gene Ontology (GO) terms of significantly different proteins in proximity of VE-Cadherin at 30min (left) and 3h (right) of stretch.

### Supplementary Figure 3

**A.** Representative western blot analysis of total Rho assay (activity measured calorimetrically with G-LISA). **B.** Representative western blot analysis of active Rac pulldown assay. **C.** Quantification of cell spread area in response to treatment of HUVEC monolayers with 10 $\mu$ m Y37632 or 5 $\mu$ m IPA3 for 15 minutes without stretch or subjected to 20% biaxial stretch for 30 or 3hrs (3 independent experiments; \*p=0.0315, \*\*\*p=0.0005 ANOVA) **D.** Representative live imaging snapshots of calcium influx (gCamp3) in response to ionophore application. Scale bars 30  $\mu$ m. **E.** Representative immunofluorescence images of VE-Cadherin and pMLC2 staining in DMSO-, 10 $\mu$ m Y37632- or 5 $\mu$ m IPA3-treated HUVEC monolayers (left) and quantification of pMLC2 intensity (right) \*\*p=0.0024 ANOVA Kruskal-Wallis.

#### **Supplementary Figure 4**

**A.** RT-qPCR (left) and Western blot (right) analysis of Piezo1 mRNA and protein levels in control and Piezo1 RNAi cells (mean  $\pm$ SD; n=6 independent experiments; \*\*\*p<0.001, Student's t-test for RT-qPCR; \*\*\*p=0.0004 for protein analysis). **B.** RT-qPCR analysis of Piezo1 mRNA in control and stretched cells (mean  $\pm$ SD; n=3 independent experiments). **C, D.** Representative Western blots (C) and quantification (D) of Piezo1 protein levels show that inhibition of the proteasome by MG132 prevents Piezo1 degradation while inhibition of the lysosome with bafilomycin A1 (BF) has no effect (mean  $\pm$ SD; n=3 independent experiments; \*\*\*p=0.002 (BF 3h); \*p=0.0253 (BF 30m) ANOVA; Holm-Sidak)

#### **Supplementary Figure 5**

**A.** Schematic illustration of the atomic force microscopy experiments to quantify monolayer cortical stiffness. **B.** Frequency distribution of monolayer elastic moduli show that stiffening in response to stretch is most effectively prevented by cytochalasin D (cytoD) treatment. Blebbistatin has a similar but less pronounced effect (n=100-120 force curves pooled across 3 independent experiments; \*p<0.002 (CytoD), Kolmogorov-Smirnov test). **C.** Representative immunofluorescence images of tubulin and vimentin show no substantial effects of stretch on these cytoskeletal elements. Scale bars 30  $\mu$ m. **D.** RT-qPCR analysis of Filamin A and B mRNA in control and Filamin A and B RNAi cells (mean  $\pm$ SD; n=3 independent experiments; \*\*p<0.0075 (Filamin A), \*\*p<0.009 (Filamin B), Student's t-test). **E.** Frequency distribution of monolayer elastic moduli in Filamin-depleted HUVEC monolayers.

#### **Supplementary Table 1**

Differential protein abundance analysis of VE-Cadherin BioID2 pulldown experiments

#### **Supplementary Table 2**

Differential protein abundance analysis in cells stretched for 60 min

#### **Supplementary Table 3**

Differential phosphoprotein abundance analysis in cells stretched for 30 min

## **Supplementary Table 4**

Differential phosphoprotein abundance analysis in cells stretched for 60 min



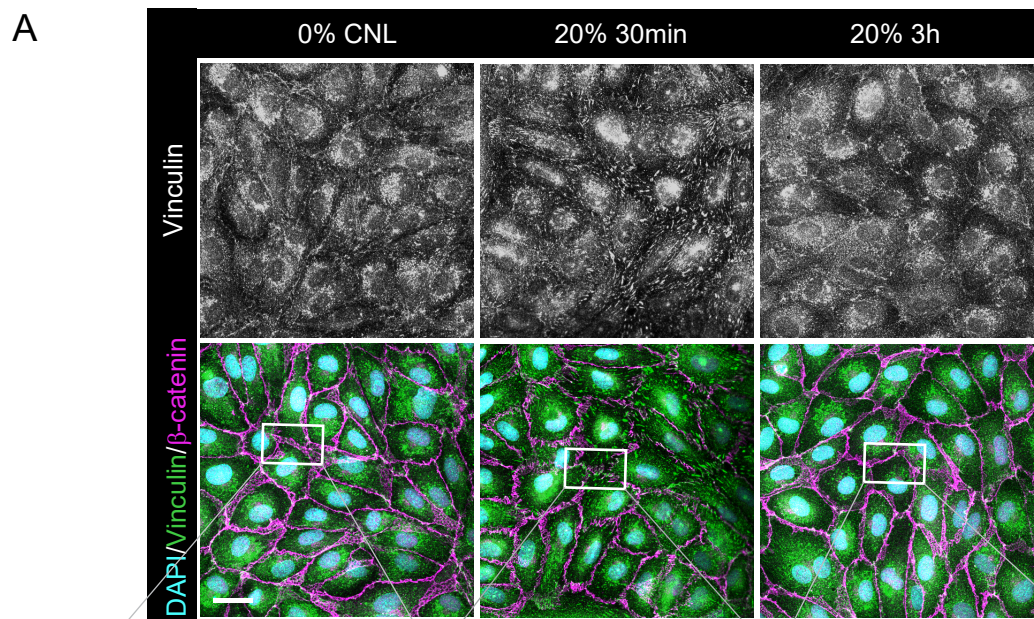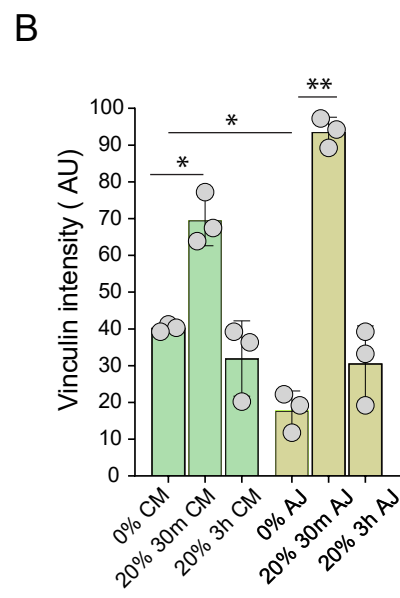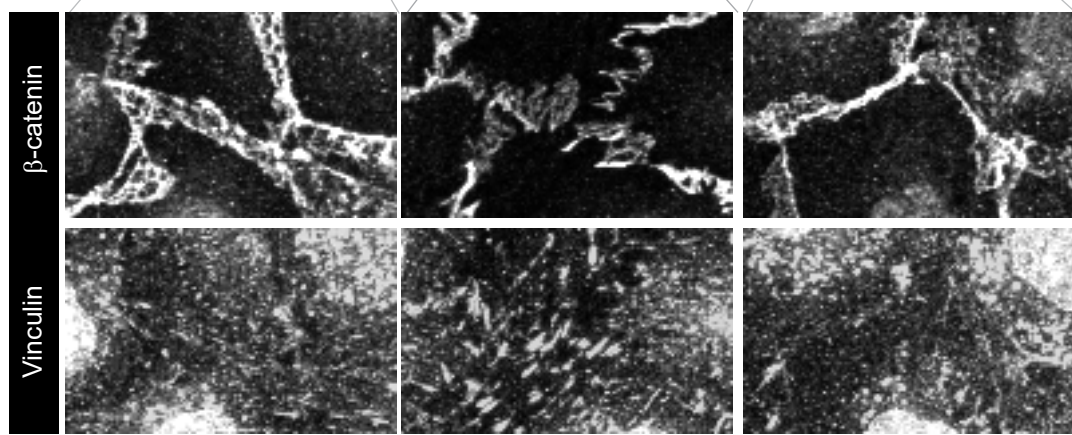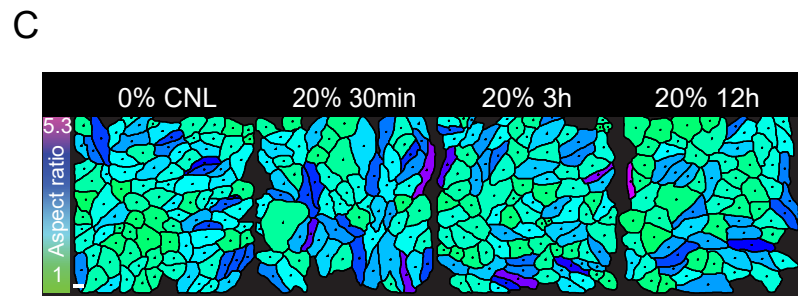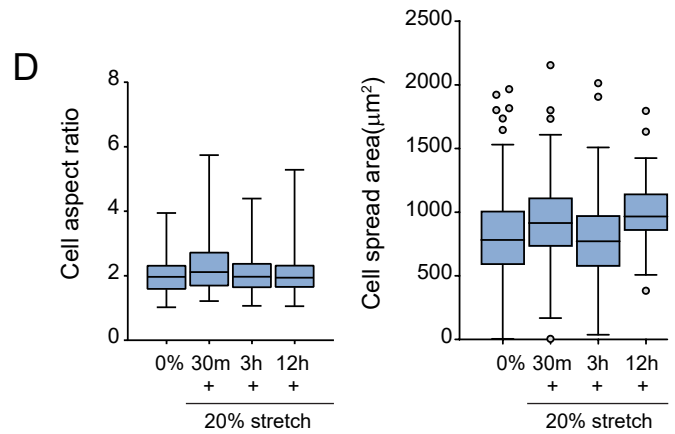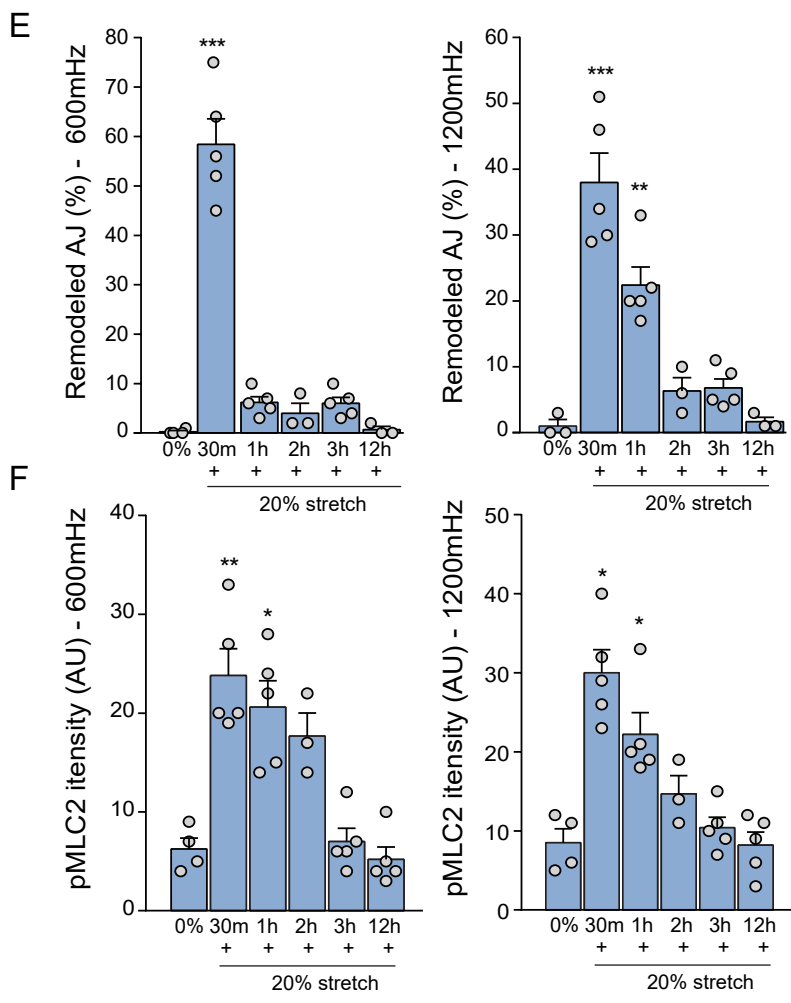

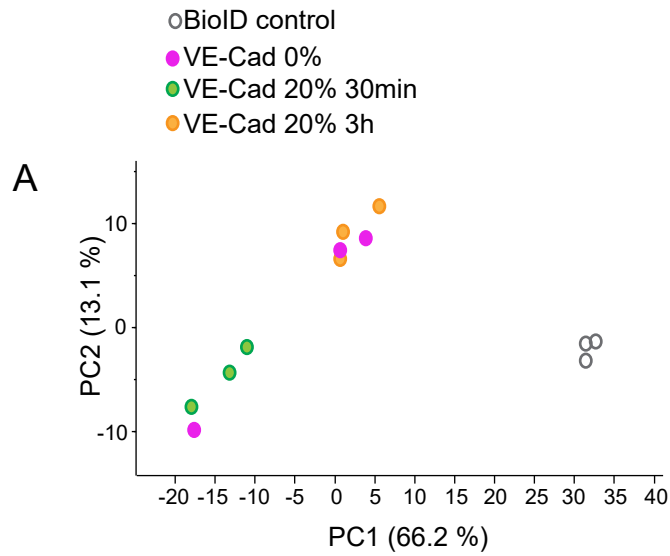

**B**

| 30min | 3h    |
|-------|-------|
| EEA1  | SNTB2 |
| DOCK9 | ILK   |
| CGN   | FSCN  |
| ILK   | VCL   |
|       | THBS1 |
|       | UTRN  |

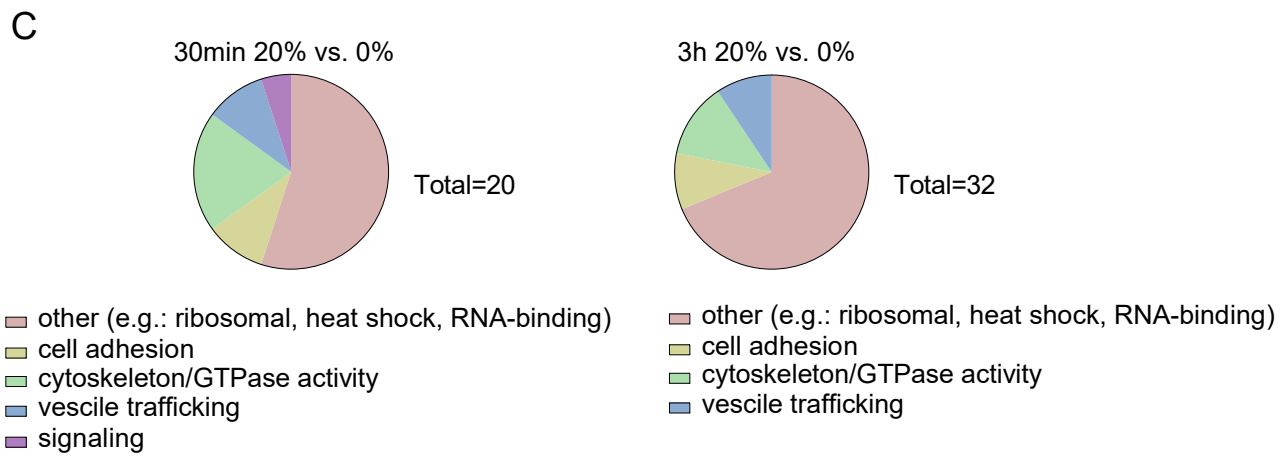

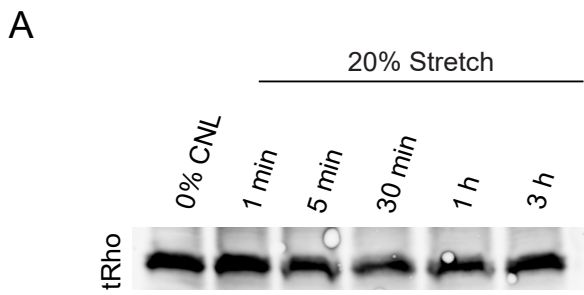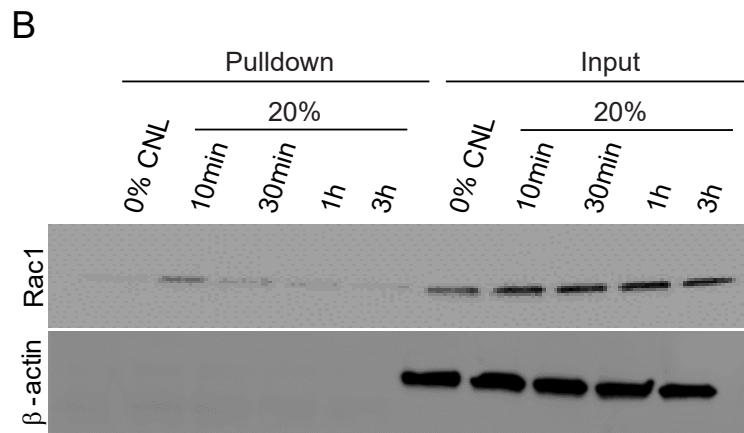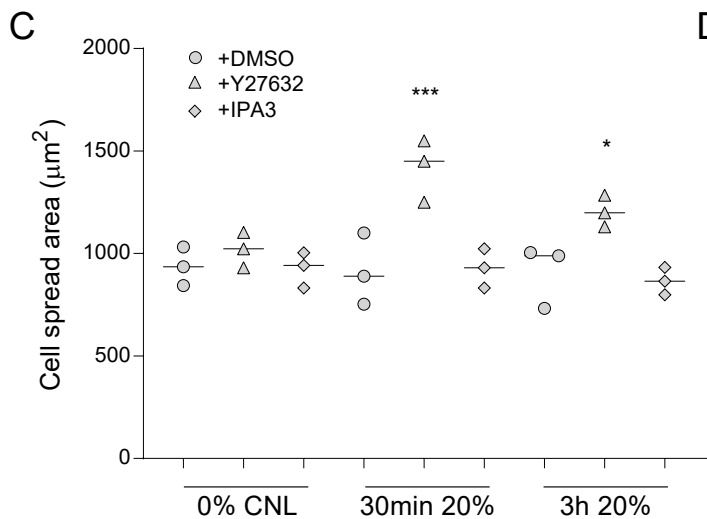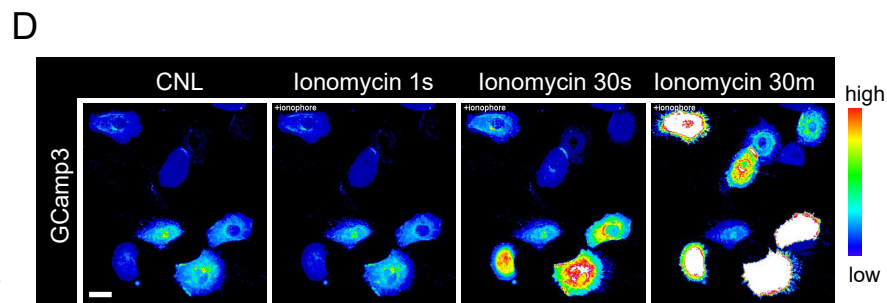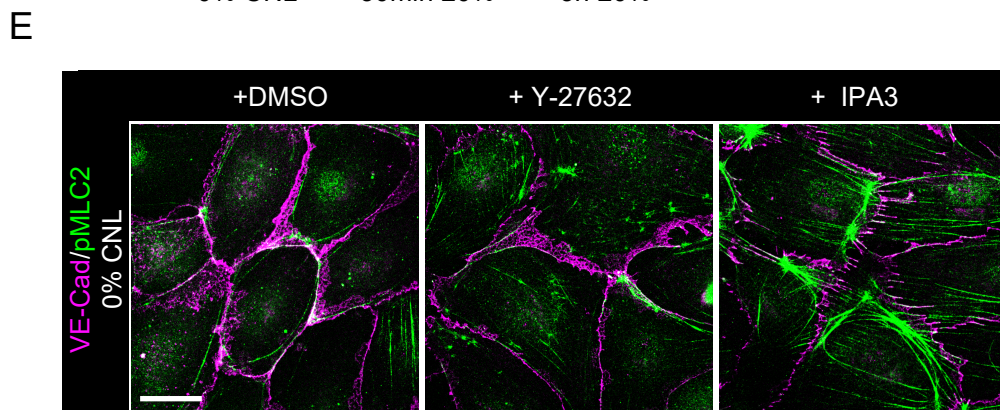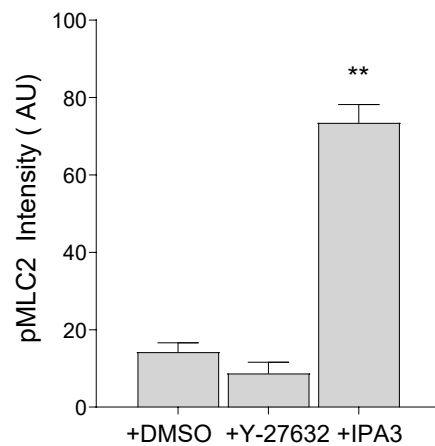

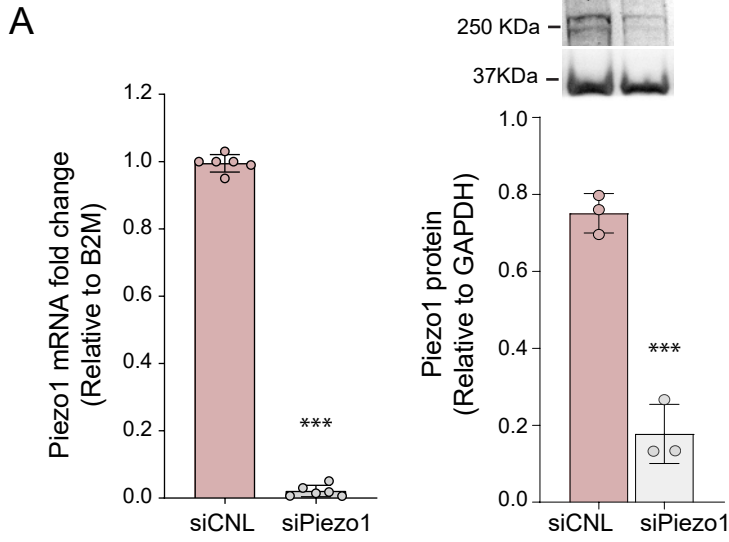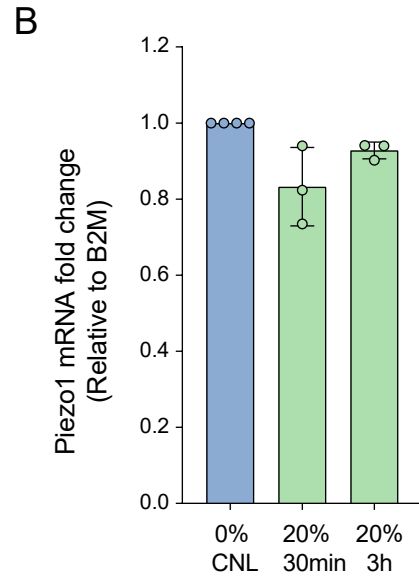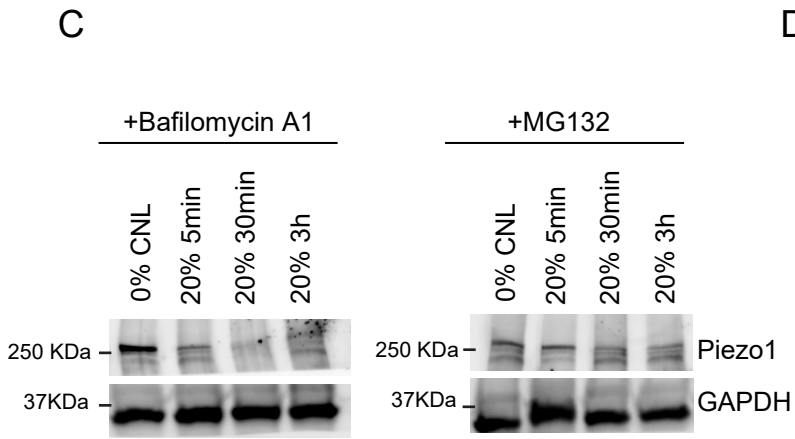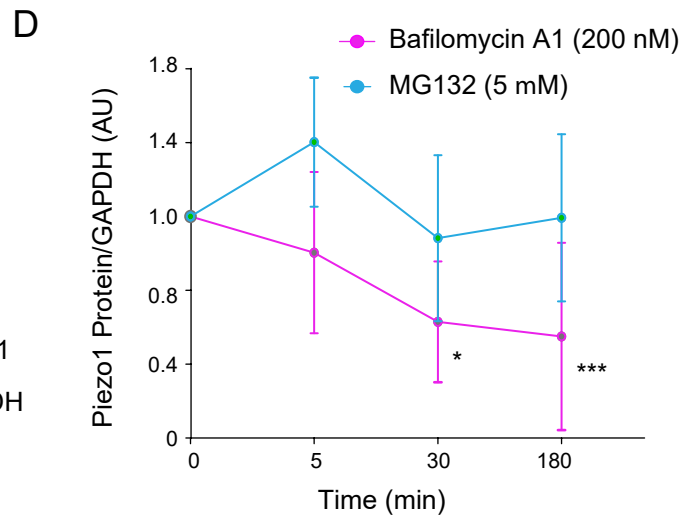



**A**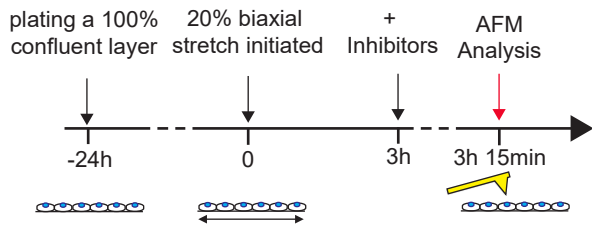**B**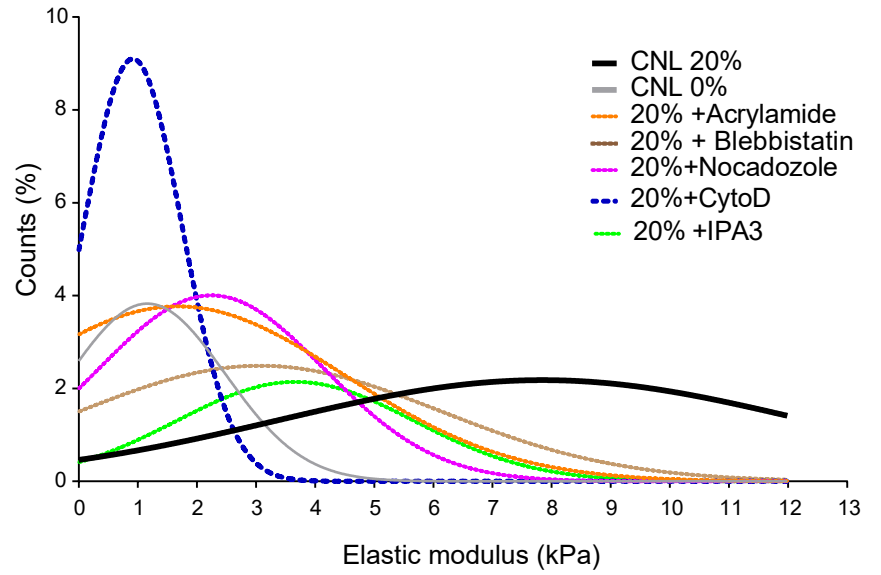**C**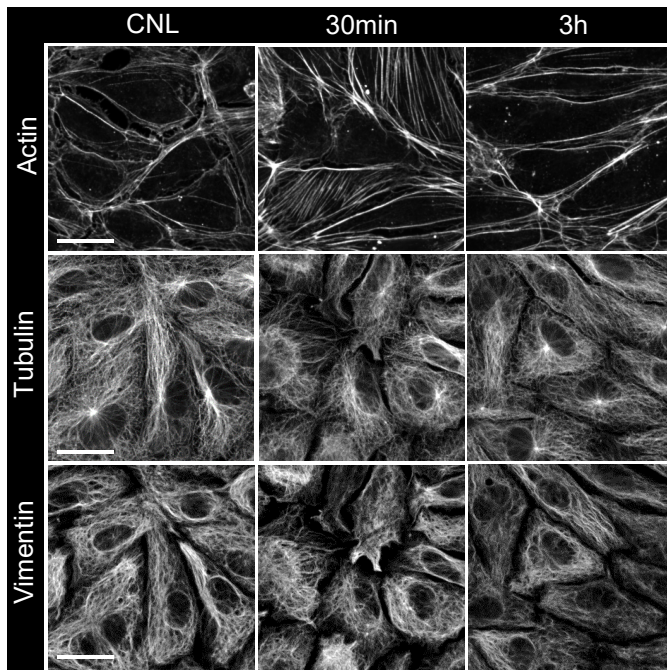**D**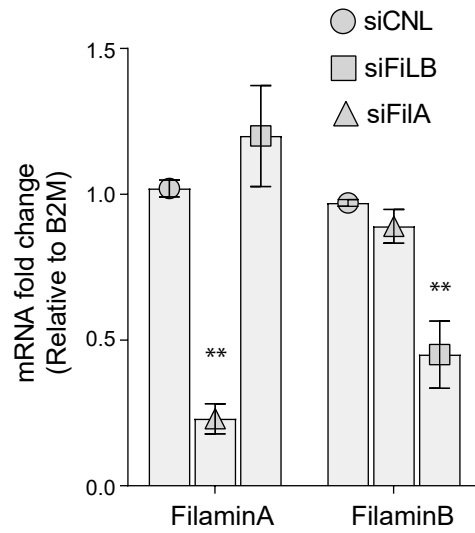**E**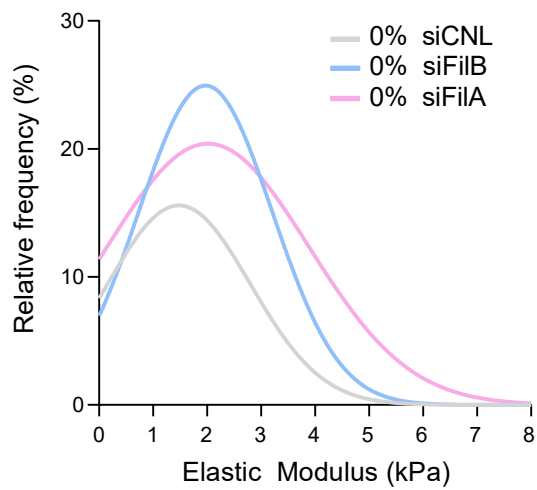

Supplement: mbc-32-1724-s001.pdf [file mbc-32-1724-s001.pdf]
